# Supplementary material
Source: MDPI journal article supplement (https://www.mdpi.com/2227-9040/11/9/485)
Supplement: s1 [file s1 › chemosensors-2514545-supplementary.pdf]

Supplementary Data

# Enhanced Modification between Glucose Dehydrogenase and Mediator Using Epoxy Silane Assembly for Monitoring Glucose

Tae-Won Seo <sup>1,†</sup>, Won-Yong Jeon <sup>2,3,†</sup> and Young-Bong Choi <sup>1,\*</sup>

<sup>1</sup> Department of Chemistry, College of Natural Science, Dankook University, Anseo-Dong, Cheonan 31116, Chungnam, Republic of Korea; xodnjs7508@dankook.ac.kr

<sup>2</sup> School of Chemical Engineering, Translational Nanobioscience Research Center, Biomedical Institute for Convergence at SKKU (BICS), Sungkyunkwan University, Suwon 16419, Gyeonggi, Republic of Korea; powerwy@skku.edu

<sup>3</sup> Bio-Convergence Materials Research Institute, Graduate School of Management of Technology, Hoseo University, Asan 31499, Chungnam, Republic of Korea; 230275@vision.hoseo.edu

\* Correspondence: chem0404@dankook.ac.kr; Tel.: +82-41-550-3437; Fax: +82-559-7860

† These authors contributed equally to this work.

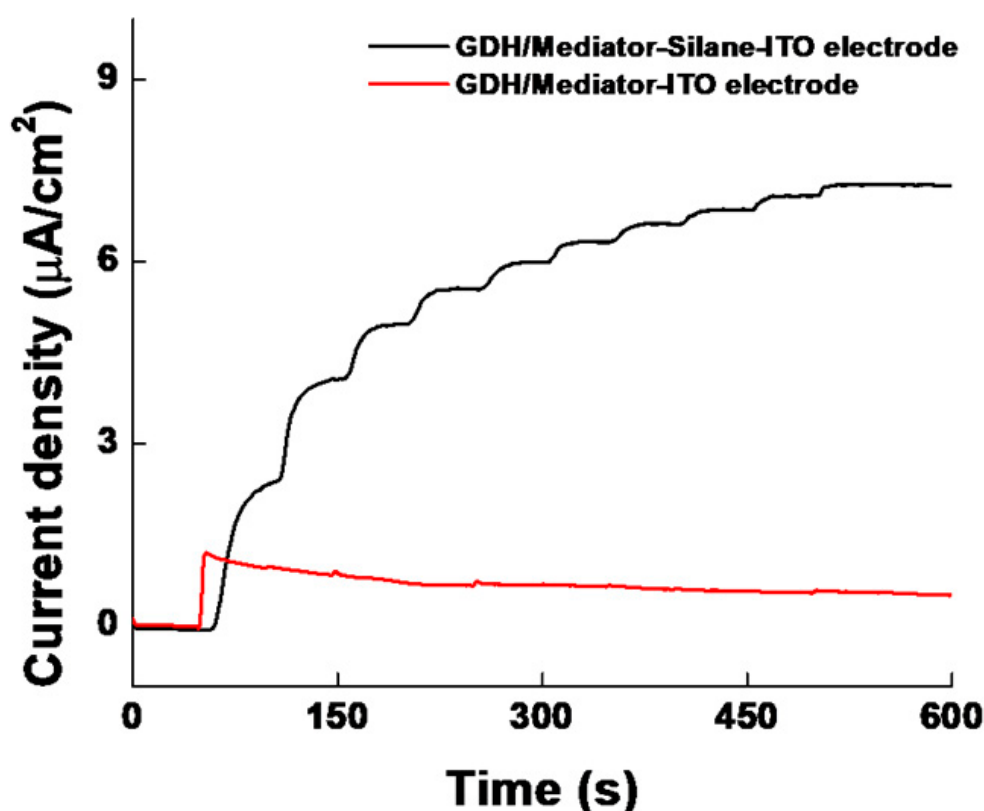

**Figure S1.** I-t curve of GDH/Mediator-Silane-ITO (black line) and GDH/Mediator-ITO (red line) electrodes according to glucose addition (Total glucose concentrations: 50 s (1.96 mM), 100 s (3.85 mM), 150 s (5.66 mM), 200 s (7.41 mM), 250 s (9.09 mM), 300 s (10.71 mM), 350 s (12.28 mM), 400 s (13.79 mM), 450 s (15.25 mM), and 500 s (16.67 mM)).
